# Supplementary material for: TRIF/miR-34a mediates aldosterone-induced cardiac inflammation and remodeling
Source: Oxford University Press journal article supplement (doi:10.1042/cs20200249), 2020-06-01
Supplement: cs-2020-0249_supp1.pdf [file cs-2020-0249_supp1.pdf]

Table S1. The echocardiographic analysis of cardiac parameters in mice after treated with aldosterone for 42 days.

|                           | WT-PBS           | KO-PBS           | WT-Aldo        | KO-Aldo          |
|---------------------------|------------------|------------------|----------------|------------------|
| Heart rate<br>(Beats/min) | 464 ± 24*        | 471 ± 15*        | 495 ± 37       | 480 ± 19*        |
| EF%                       | 70.32 ± 2.45***  | 75.98 ± 4.16***  | 46.11 ± 11.38  | 60.31 ± 12.12**  |
| FS%                       | 46.12 ± 2.93***  | 47.32 ± 5.32**   | 30.14 ± 7.03   | 40.12 ± 3.02**   |
| LVAW;d (mm)               | 0.81 ± 0.27***   | 0.79 ± 0.15***   | 1.47 ± 0.36    | 1.05 ± 0.23**    |
| LVAW;s (mm)               | 1.19 ± 0.26***   | 1.01 ± 0.19***   | 1.87 ± 0.43    | 1.42 ± 0.15**    |
| LVID;d (mm)               | 3.46 ± 0.19**    | 3.13 ± 0.24**    | 4.66 ± 0.53    | 4.10 ± 0.32**    |
| LVID;s (mm)               | 2.01 ± 0.19*     | 2.31 ± 0.17*     | 2.99 ± 0.53    | 2.43 ± 0.32*     |
| LVPW;d (mm)               | 0.71 ± 0.18***   | 0.73 ± 0.12***   | 1.45 ± 0.43    | 0.92 ± 0.32*     |
| LVPW;s (mm)               | 1.12 ± 0.17***   | 1.21 ± 0.21***   | 1.76 ± 0.32    | 1.42 ± 0.32*     |
| LV Mass (mg)              | 117.43 ± 5.34*** | 125.26 ± 5.43*** | 198.53 ± 43.64 | 150.17 ± 16.74** |

Data are means ± SEM. EF: ejection fraction; FS: fraction shorten; LVAW: left ventricular anterior wall, LVID: left ventricular internal dimension, LVPW: left ventricle posterior wall thickness, LV mass: left ventricle mass. \*p < 0.05, \*\*p < 0.01, \*\*\*p < 0.001, as compared with WT-Aldo group.
